# Supplementary material for: Early in-hospital course of critically ill nontrauma patients in a resuscitation room of a German emergency department (OBSERvE2 study)
Source: Springer Nature journal article supplement (doi:10.1007/s00101-021-00962-3), 2021-04-30
Supplement: MOESM1 [file 19121796]

[Supplemental material](#) „Early In-hospital Course of Critically Ill Nontraumatic Patients in a Resuscitation Room of a German Emergency Department (OBSERvE2-study)“ von Grahl C., Hartwig T., Weidhase L. et al. (2021) in *Der Anaesthetist*.

Article and additional material are available at [www.springermedizin.de](http://www.springermedizin.de). Please enter the title of the article in the search field.

**Supplemental Table 1: Resuscitation room admission criteria\*.[1]**

**Airway and breathing problems (“airway” and “breathing”)**

- airway obstruction (e.g. tongue swelling)
- respiratory insufficiency with high respiratory rate (with respiratory weakness) or low oxygen saturation
- necessity for invasive airway management
- invasive and non-invasive mechanical ventilation

**Circulation problems (“circulation”)**

- cardiovascular insufficiency (e.g. hypotension, shock of any origin)
- state after or under cardiopulmonary resuscitation
- dysrhythmias
- bleeding

**Unconsciousness or neurological deficit (“disability”)**

- ongoing unconsciousness of any origin

**Critical physical state (“environment”)**

- intoxication with an ABCDE problem
- rhabdomyolysis
- hypothermia

\*Additional other resuscitation room activation criteria may exist and activation depends on the attending physician in charge

[1] Bernhard M, Döll S, Hartwig T, et al. Resuscitation room management of critically ill nontraumatic-patients in a German emergency department (OBSERvE-Study). *Eur J Emerg Med* 2018; 25: e9-e17
